# Supplementary material for: Pharmacogenes that demonstrate high association evidence according to CPIC, DPWG, and PharmGKB
Source: Frontiers journal article supplement (doi:10.3389/fmed.2022.1001876), 2022-10-25
Supplement: Table_1.pdf [file Table_1.pdf]

**Supplementary Table:** Official full names of pharmacogenes, ontology, biological function, and gene ID as seen in the National Center for Biotechnology Information (NCBI) database.

| Symbol         | Gene Name                                                                          | Gene Ontology       | Biological function | Gene ID as seen in NCBI |
|----------------|------------------------------------------------------------------------------------|---------------------|---------------------|-------------------------|
| <b>ABCG2</b>   | ATP binding cassette subfamily G member 2 (Junior blood group)                     | Plasma Membrane     | transporter         | 9429                    |
| <b>ACE</b>     | angiotensin I converting enzyme                                                    | Plasma Membrane     | enzyme              | 1636                    |
| <b>ADD1</b>    | adducin 1                                                                          | Plasma Membrane     | transporter         | 118                     |
| <b>ADRB2</b>   | adrenoceptor beta 2                                                                | Plasma Membrane     | receptor            | 154                     |
| <b>APOE</b>    | apolipoprotein E                                                                   | Extracellular Space | transporter         | 348                     |
| <b>ATIC</b>    | 5-aminoimidazole-4-carboxamide ribonucleotide formyltransferase/IMP cyclohydrolase | Cytoplasm           | enzyme              | 471                     |
| <b>CACNA1S</b> | calcium voltage-gated channel subunit alpha1 S                                     | Plasma Membrane     | ion channel         | 779                     |
| <b>CES1</b>    | carboxylesterase 1                                                                 | Cytoplasm           | enzyme              | 1066                    |
| <b>CFTR</b>    | CF transmembrane conductance regulator                                             | Plasma Membrane     | ion channel         | 1080                    |
| <b>CHRNA5</b>  | cholinergic receptor nicotinic alpha 5 subunit                                     | Plasma Membrane     | receptor            | 1138                    |
| <b>CPS1</b>    | carbamoyl-phosphate synthase 1                                                     | Cytoplasm           | enzyme              | 1373                    |
| <b>CYP2A6</b>  | cytochrome P450 family 2 subfamily A member 6                                      | Cytoplasm           | enzyme              | 1548                    |
| <b>CYP2B6</b>  | cytochrome P450 family 2 subfamily B member 6                                      | Cytoplasm           | enzyme              | 1555                    |
| <b>CYP2C9</b>  | cytochrome P450 family 2 subfamily C member 9                                      | Cytoplasm           | enzyme              | 1559                    |
| <b>CYP2C19</b> | cytochrome P450 family 2 subfamily C member 19                                     | Cytoplasm           | enzyme              | 1557                    |
| <b>CYP2D6</b>  | cytochrome P450 family 2 subfamily D member 6                                      | Cytoplasm           | enzyme              | 1565                    |
| <b>CYP3A4</b>  | cytochrome P450 family 3 subfamily A member 4                                      | Cytoplasm           | enzyme              | 1576                    |
| <b>CYP3A5</b>  | cytochrome P450 family 3 subfamily A member 5                                      | Cytoplasm           | enzyme              | 1577                    |
| <b>CYP4F2</b>  | cytochrome P450 family 4 subfamily F member 2                                      | Cytoplasm           | enzyme              | 8529                    |
| <b>DPYD</b>    | dihydropyrimidine dehydrogenase                                                    | Cytoplasm           | enzyme              | 1806                    |

|                      |                                                            |                     |                               |           |
|----------------------|------------------------------------------------------------|---------------------|-------------------------------|-----------|
| <b>EGFR</b>          | epidermal growth factor receptor                           | Plasma Membrane     | receptor                      | 1956      |
| <b>FCGR3A</b>        | Fc fragment of IgG receptor IIIa                           | Plasma Membrane     | receptor                      | 2214      |
| <b>FVL (F5)</b>      | Factor V Leiden                                            | Extracellular Space | coagulation cofactor          | 2153      |
| <b>GBA</b>           | glucosylceramidase beta                                    | Cytoplasm           | enzyme                        | 2629      |
| <b>G6PD</b>          | glucose-6-phosphate dehydrogenase                          | Cytoplasm           | enzyme                        | 2539      |
| <b>HLA-A</b>         | major histocompatibility complex, class I, A               | Plasma Membrane     | antigen presentation          | 3105      |
| <b>HLA-B</b>         | major histocompatibility complex, class I, B               | Plasma Membrane     | antigen presentation          | 3106      |
| <b>HLA-C</b>         | major histocompatibility complex, class I, C               | Plasma Membrane     | antigen presentation          | 3107      |
| <b>HLA- DPB1</b>     | major histocompatibility complex, class II, DP beta 1      | Plasma membrane     | antigen presentation          | 3115      |
| <b>HLA-DRB1</b>      | major histocompatibility complex, class II, DR beta 1      | Plasma membrane     | antigen presentation          | 3123      |
| <b>HPRT1</b>         | hypoxanthine phosphoribosyltransferase 1                   | Cytoplasm           | enzyme                        | 3251      |
| <b>IFNL3 (IL28B)</b> | interferon lambda 3                                        | Extracellular Space | cytokine                      | 282617    |
| <b>IFNL4</b>         | interferon lambda 4                                        | Cytoplasm           | cytokine                      | 101180976 |
| <b>ITPA</b>          | inosine triphosphatase                                     | Cytoplasm           | enzyme                        | 3704      |
| <b>KIF6</b>          | kinesin family member 6                                    | Nucleus             | microtubule-based movement    | 221458    |
| <b>MTHFR</b>         | methylenetetrahydrofolate reductase                        | Cytoplasm           | enzyme                        | 4524      |
| <b>MT-RNR1</b>       | mitochondrially encoded 12S RNA                            | Cytoplasm           | insulin sensitivity regulator | 4549      |
| <b>NAGS</b>          | N-acetylglutamate synthase                                 | Cytoplasm           | enzyme                        | 162417    |
| <b>NAT2</b>          | N-acetyltransferase 2                                      | Cytoplasm           | enzyme                        | 10        |
| <b>NUDT15</b>        | nudix hydrolase 15                                         | Cytoplasm           | enzyme                        | 55270     |
| <b>OTC</b>           | ornithine carbamoyltransferase                             | Cytoplasm           | enzyme                        | 5009      |
| <b>POLG</b>          | DNA polymerase gamma, catalytic subunit                    | Cytoplasm           | enzyme                        | 5428      |
| <b>RYR1</b>          | ryanodine receptor 1                                       | Cytoplasm           | ion channel                   | 6261      |
| <b>SCN1A</b>         | sodium voltage-gated channel alpha subunit 1               | Plasma Membrane     | ion channel                   | 6323      |
| <b>SLC19A1</b>       | solute carrier family 19 member 1                          | Plasma Membrane     | transporter                   | 6573      |
| <b>SLCO1B1</b>       | solute carrier organic anion transporter family member 1B1 | Plasma Membrane     | transporter                   | 10599     |
| <b>TNF-α</b>         | tumor necrosis factor-alpha                                | Intracellular       | cytokine                      | 7124      |

|               |                                                | Space     |        |       |
|---------------|------------------------------------------------|-----------|--------|-------|
| <b>TPMT</b>   | thiopurine S-methyltransferase                 | Cytoplasm | enzyme | 7172  |
| <b>UGT1A1</b> | UDP glucuronosyltransferase family 1 member A1 | Cytoplasm | enzyme | 54658 |
| <b>VKORC1</b> | vitamin K epoxide reductase complex subunit 1  | Cytoplasm | enzyme | 79001 |
